# Supplementary material for: Memory-dictated dynamics of single-atom Pt on CeO2 for CO oxidation
Source: PubMed Central journal article supplement (PMC10169862; doi:10.1038/s41467-023-37776-3), 2023-05-09
Supplement: 41467_2023_37776_MOESM2_ESM.pdf [file 41467_2023_37776_MOESM2_ESM.pdf]

### Memory-dictated Dynamics of Single-atom Pt on CeO<sub>2</sub> for CO Oxidation

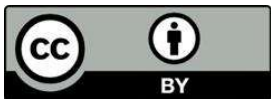

**Open Access** This file is licensed under a Creative Commons Attribution 4.0 International License, which permits use, sharing, adaptation, distribution and reproduction in any medium or format, as long as you give appropriate credit to the original author(s) and the source, provide a link to the Creative Commons license, and indicate if changes were made. In the cases where the authors are anonymous, such as is the case for the reports of anonymous peer reviewers, author attribution should be to 'Anonymous Referee' followed by a clear attribution to the source work. The images or other third party material in this file are included in the article's Creative Commons license, unless indicated otherwise in a credit line to the material. If material is not included in the article's Creative Commons license and your intended use is not permitted by statutory regulation or exceeds the permitted use, you will need to obtain permission directly from the copyright holder. To view a copy of this license, visit <http://creativecommons.org/licenses/by/4.0/>.

## Reviewers' comments:

### Reviewer #1 (Remarks to the Author):

The manuscript by Zhang et al. reports two ceria-supported single atom Pt catalysts with different coordination environments, Pt/CeO<sub>2</sub> (adsorbed Pt<sup>1</sup>) and Pt<sub>at</sub>/CeO<sub>2</sub> (square planar Pt<sup>1</sup> embedded in the ceria surface). The structural evolution of these two SACs was investigated by a multitechnique approach including various spectroscopic and microscopic methods in conjunction with DFT calculations. The authors found that both SACs show structural memory behaviors under reductive-oxidative treatment cycles. It is an interesting work on single atom catalysis. However, I cannot recommend this manuscript for publication in its current form.

- 1) The assignment and deconvolution of the Ce<sup>3+</sup> and Ce<sup>4+</sup> peaks in the XPS spectra (Fig. 1h and Fig. 4g) are not correct. The Ce XPS data should be re-analyzed based on a proper assignment and deconvolution process.
- 2) I did not see a significant difference in frequency between the IR signals (2094 vs. 2089 cm<sup>-1</sup>, Fig. 1i) of CO adsorbed on two different types of Pt single atoms in Pt/CeO<sub>2</sub> and Pt<sub>at</sub>/CeO<sub>2</sub>.
- 3) The dynamic structural evolution of Pt from charged single atoms to reduced clusters was tracked by CO vibrations that vary in frequency depending on both oxidation states and coordination numbers. The formation of Pt clusters was characterized by low-lying CO bands around 2070 and 2050 cm<sup>-1</sup> (Fig. S19). However, in the previous work (Ref. 22) they assigned these CO bands to reduced Pt<sup>1</sup>. This is a key point and should be discussed in more detail based on the recent study of structure changes of Pt/CeO<sub>2</sub>, where IR vibrational bands were observed for CO molecules adsorbed on surface sites exposed by both Pt and ceria support (modified via interaction with Pt, see J. Phys. Chem. C 2022, 126, 9051).
- 4) The IR band at 2114 cm<sup>-1</sup> was assigned to CO bound to oxidized PtO<sub>x</sub> clusters. However, a closer analysis shows that the 2114 cm<sup>-1</sup> signal is proportional in intensity to the one at about 2170 cm<sup>-1</sup> (Fig. 3a-c), revealing that they are more likely to originate from the CO gas phase contribution, rather than CO-PtO<sub>x</sub>.
- 5) The redispersion of Pt NPs into Pt<sup>1</sup> in O<sub>2</sub> at 500 °C was visualized by HAADF-STEM. It would be better to mark them in the corresponding images (Fig. S27).
- 6) I would suggest to perform additional calculations on the CO vibrational frequency. The agreement of computed and experimental frequencies of CO adsorbed on different Pt<sup>1</sup> sites would strengthen the conclusions, in particular the proposed structure of adsorbed Pt<sup>1</sup> on ceria.
- 7) It has been reported that differently shaped ceria NPs could undergo massive surface restructuring under activation and reaction conditions at elevated temperatures. The morphological changes of ceria support should have significant impact on the interaction with Pt and the activity for CO oxidation (see e.g. J. Phys. Chem. Lett. 2020, 11, 7925).

### Reviewer #2 (Remarks to the Author):

This paper reports the dynamic properties of Pt/CeO<sub>2</sub> single atom catalysts according to their initial

calcination step (500°C for Pt/CeO<sub>2</sub> and 800°C for PtATCeO<sub>2</sub>). The Dynamic evolution of the Pt nanostructure was probed under CO oxidation condition and redox sequences by advanced in-situ characterization techniques (EXAFS, DRIFT, RAMAN) and DFT calculations. Noteworthy results deal with the initial Pt nanostructure (Pt single atoms interaction with ceria surface) which was found to depend on the initial annealing temperature. Pt nanoparticles formed by a reduction step redisperse under oxidizing conditions and return to their initial nanostructure. However, these main findings are not original as dynamic properties of Pt/CeO<sub>2</sub> are well documented in the literature including the initial nanostructure of Pt/CeO<sub>2</sub> single atoms as a function of the annealing temperature. The location of Pt single atoms on ceria after a calcination at low (400-500°C) and high (750-800°C) has been already fully described by similar characterization techniques and DFT (see for instance : [10.1002/anie.201402342](https://doi.org/10.1002/anie.201402342), <https://doi.org/10.1038/s41929-020-00508-7>, <https://doi.org/10.1021/acs.jpcc.2c02420>, <https://doi.org/10.1016/j.apcatb.2020.119304>). The reversibility between single atoms and nanoparticles as a function of temperature and redox atmosphere and its consequence on CO oxidation catalytic activity is also well reported in previous papers (see for instance : [10.1002/anie.200803126](https://doi.org/10.1002/anie.200803126), [10.1039/d0cy00732c](https://doi.org/10.1039/d0cy00732c)).

One of the main difficulties with Pt/CeO<sub>2</sub> catalysts is to differentiate oxidized Pt clusters and Pt single atoms using STEM or EXAFS. The presence of few oxidized Pt clusters can strongly modify the surface reactivity of the catalyst. From my point of view, it is difficult to clearly conclude from the results of the characterization techniques used in this study that the investigated catalysts only contain adsorbed single atoms and no oxidized Pt clusters. Furthermore, the Pt-Pt coordination numbers determined by EXAFS are not reported. In a recent study ([10.1021/jacs.9b09156](https://doi.org/10.1021/jacs.9b09156)), Resasco et al. have demonstrated that isolated Pt atoms cannot chemisorb CO at low temperature, contrary to the catalysts of this study (Fig 1i). The same paper and another recent study (<https://doi.org/10.1021/acs.jpcc.1c06784>) have assigned bond CO with a stretch at 2095 cm<sup>-1</sup> to adsorption on oxidized Pt clusters. Similar IR bands were observed in this study at 2094 cm<sup>-1</sup> for Pt/CeO<sub>2</sub> and to a lesser extent at 2089 cm<sup>-1</sup> for PtATCeO<sub>2</sub> at 100°C under CO oxidation condition but were attributed to ionic Pt although they could indicate the presence of small oxidized Pt clusters, especially on the catalyst calcined at 500°C. In addition, Fig. S13a clearly shows a small band near 2072 cm<sup>-1</sup>, characteristic of Pt clusters as observed after CO reduction (Fig S19). Another insight of the possible presence of PtO<sub>x</sub> clusters in Pt/CeO<sub>2</sub> is its activation energy for CO oxidation which was found to be 44.6 kJ/mole. This value corresponds to reduced catalysts containing Pt nanoparticles (see for instance [10.1021/jacs.9b09156](https://doi.org/10.1021/jacs.9b09156), [10.1039/d0cy00732c](https://doi.org/10.1039/d0cy00732c)). The presence of small PtO<sub>x</sub> clusters in Pt/CeO<sub>2</sub> could also explain its good catalytic activity (Fig. 2a).

According to the authors, the Pt single atoms in Pt/CeO<sub>2</sub> would be easier to sinter and to form Pt nanoparticles in reducing atmosphere than ones in PtATCeO<sub>2</sub>. If so, why the two catalysts achieve the same activity for CO oxidation after the same reduction step in CO ? By the same way, Fig. S26 seems to indicate that the redispersion of Pt is slower on PtAT/CeO<sub>2</sub>. Is-it coherent with the proposed mechanism ?

I would recommend before considering this paper for publication to clearly confirm the absence of any PtOx clusters on Pt/CeO<sub>2</sub> by CO pulse chemisorption and H<sub>2</sub>-TPR. This latter technique could give an insight on the presence of PtOx clusters from the onset reduction temperature as isolated Pt<sup>2+</sup> sites are inactive towards H<sub>2</sub> dissociation (10.1021/acscatal.8b00330, 10.1039/c6cp00627b, <https://doi.org/10.1021/acscatal.1c04565>). According to J. Resasco et al. (10.1021/jacs.9b09156), catalysts in which Pt is reduced at low temperatures (around 200 °C) contain PtOx clusters.

#### Reviewer #3 (Remarks to the Author):

This manuscript investigates the reversible structural evolution of Pt/CeO<sub>2</sub> and PtATCeO<sub>2</sub> SACs under different atmospheres. In addition, the two SACs catalysts display dramatically different catalytic activity towards CO oxidation, which are explained by the different initial Pt<sup>1</sup> local configurations. However, considering some catalytic behavior of the SACs, the identification of the active site and the related structural-activity relationship is suspicious, which is needed to be addressed in details.

(1) P13, Line 310: The processing temperatures for Pt/CeO<sub>2</sub>-CO and Pt/CeO<sub>2</sub>-CO-O<sub>2</sub> are not shown in the Methods section.

(2) For PtATCeO<sub>2</sub> sample treated at 800 °C, the particle size of CeO<sub>2</sub> increases from 12 to ~22 nm with the significantly decreased surface area. In addition to the surface reconstruction, the agglomeration of bulk phase CeO<sub>2</sub> is inevitable. If it is possible that a large amount of Pt enters the lattice of CeO<sub>2</sub>? This will affect the amount of available Pt atoms on the surface.

(3) In Fig. 1i, considering the spectral resolution (4 cm<sup>-1</sup>), the different IR band is too small (5 cm<sup>-1</sup>). In addition, why the CO-DRIFT spectra were collected at 100°C under reaction conditions? The CO atmosphere and room temperature should be better for the characterization.

(4) According to the evaluation results, the Pt NPs show significantly better catalytic activity than SACs. Therefore, confirming the real active site in the two fresh SACs is very important for the following structure-activity relationship. As shown in Fig. 2a and Fig. S14, Pt/CeO<sub>2</sub> and 0.1Pt/CeO<sub>2</sub> show significant different light-off temperatures (100 vs. 200 °C). At 200 °C, the CO conversion is 100% over Pt/CeO<sub>2</sub>. If the active sites are the same for these two SACs catalysts, the CO conversion should be larger than 10% for 0.1Pt/CeO<sub>2</sub>, which is accurately ~2%. This indicates that the active site in Pt/CeO<sub>2</sub> is more active. How does the author comment on this result?

(5) Similar results are shown over PtATCeO<sub>2</sub> and 0.1PtATCeO<sub>2</sub> (Figure 2a and S14), the light-off temperatures are 200 and 300 °C, respectively. In addition, the catalytic activity of 0.1PtATCeO<sub>2</sub> is

similar with that over CeO<sub>2</sub> (Figure S10). Therefore, the Pt cluster and CeO<sub>2</sub> are important active sites for the fresh Pt/CeO<sub>2</sub> and PtATCeO<sub>2</sub> catalysts, which are not well considered in this manuscript.

**Reviewer #1:** The manuscript by Zhang et al. reports two ceria-supported single atom Pt catalysts with different coordination environments, Pt/CeO<sub>2</sub> (adsorbed Pt<sub>1</sub>) and Pt<sub>at</sub>CeO<sub>2</sub> (square planar Pt<sub>1</sub> embedded in the ceria surface). The structural evolution of these two SACs was investigated by a multitechnique approach including various spectroscopic and microscopic methods in conjunction with DFT calculations. The authors found that both SACs show structural memory behaviors under reductive-oxidative treatment cycles. It is an interesting work on single atom catalysis. However, I cannot recommend this manuscript for publication in its current form.

1) The assignment and deconvolution of the Ce<sup>3+</sup> and Ce<sup>4+</sup> peaks in the XPS spectra (Fig. 1h and Fig. 4g) are not correct. The Ce XPS data should be re-analyzed based on a proper assignment and deconvolution process.

**Reply:** We appreciate the constructive comments provided by the reviewer. We acknowledge that XPS peak fitting of Ce 3d spectra from CeO<sub>x</sub> is a complex and highly debated topic within the XPS community. In particular, there is an extensive review by Ernesto Paparazzo entitled “Use and mis-use of x-ray photoemission spectroscopy Ce 3d spectra of Ce<sub>2</sub>O<sub>3</sub> and CeO<sub>2</sub>” that summarizes the peak fitting methods of different research groups and discusses the challenges associated with the accuracy of peak fitting.

For this study, the analysis of Ce 3d XPS spectra was conducted by our co-author, Mark H. Engelhard, who is an expert in the field of XPS. In our previous work (*Nature* **2022**, 611, 284), we presented a typical XPS peak fit to the Ce 3d spectrum, as shown in **Fig. R1a** below. Similar XPS peak fittings can also be seen in other studies, such as *Nat Commun* **2019**, 10, 1358 and *Nat Catal* **2021**, 4, 469. In this work, the analysis method of Ce 3d XPS spectra follows the same approach as described in the above studies, as shown in **Fig. R1b** (**Fig. 4g** in this work).

We acknowledge that there are other methods used for peak fitting of Ce 3d spectra, and there may be ongoing debates about which method is optimal. However, we believe that the trend of the Ce<sup>3+</sup>/Ce<sup>4+</sup> ratio obtained by our method is consistent with other proposed methods. We appreciate

any additional insights or suggestions the reviewer may have on the proper assignment and deconvolution process. However, we believe that this discussion is beyond the scope of this work.

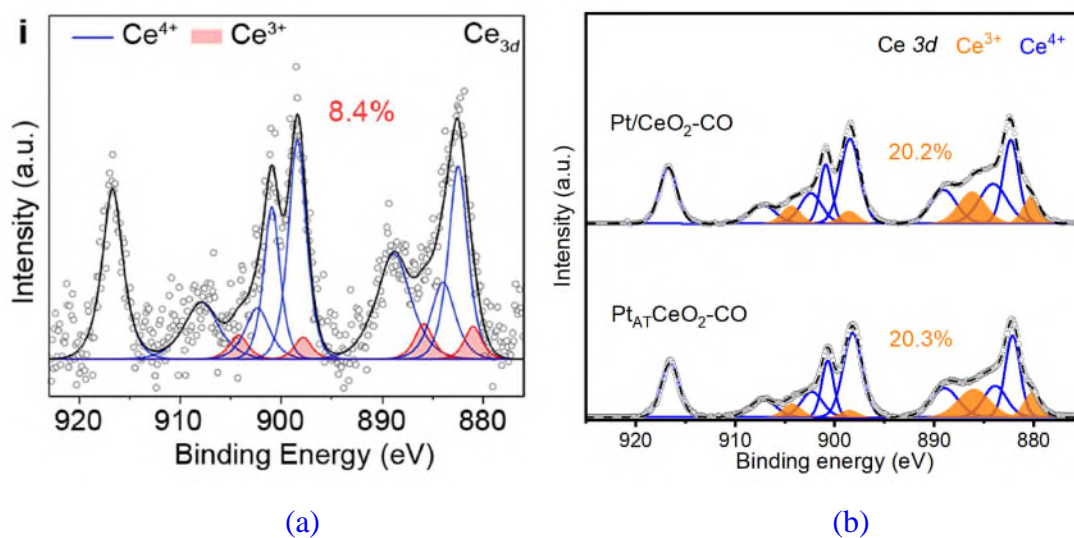

**Figure R1** Typical XPS peak fit of the Ce 3d spectra from the previous study (a) *Nature* **2022**, 611, 284 (<https://doi.org/10.1038/s41586-022-05251-6>) and (b) from Fig. 4g in this work.

2) I did not see a significant difference in frequency between the IR signals (2094 vs. 2089  $\text{cm}^{-1}$ , Fig. 1i) of CO adsorbed on two different types of Pt single atoms in Pt/CeO<sub>2</sub> and Pt<sub>at</sub>CeO<sub>2</sub>.

**Reply:** Although the difference in the IR frequencies of CO adsorbed on the two Pt<sub>1</sub> measured at 100 °C might seem insignificant in **Fig. 1i**, it does exist. The shift in the CO vibrational peak is more noticeable at 35 °C, i.e., 2095 vs. 2088  $\text{cm}^{-1}$  (**Fig. 3a and 3b**). This phenomenon was also observed in a recent study in *Nat. Commun.* (<https://doi.org/10.1038/s41467-022-34797-2>), where the IR vibrational frequency of Pt<sub>1</sub>/CeO<sub>2</sub> calcined at 550 °C is different from Pt<sub>AT</sub>CeO<sub>2</sub> calcined at 800 °C in the CO-DRIFTS results. Thus, we believe that the IR difference between the two samples can be used to identify the structural differences of Pt<sub>1</sub> between Pt<sub>1</sub>/CeO<sub>2</sub> and Pt<sub>AT</sub>CeO<sub>2</sub>.

3) The dynamic structural evolution of Pt from charged single atoms to reduced clusters was tracked by CO vibrations that vary in frequency depending on both oxidation states and coordination numbers. The formation of Pt clusters was characterized by low-lying CO bands around 2070 and 2050  $\text{cm}^{-1}$  (Fig. S19). However, in the previous work (Ref. 22) they assigned these CO bands to reduced  $\text{Pt}_1$ . This is a key point and should be discussed in more detail based on the recent study of structure changes of Pt/CeO<sub>2</sub>, where IR vibrational bands were observed for CO molecules adsorbed on surface sites exposed by both Pt and ceria support (modified via interaction with Pt, see *J. Phys. Chem. C* 2022, 126, 9051).

**Reply:** While CO-DRIFTS is powerful tool for distinguishing single atoms from nanoparticles, there is still some controversy surrounding its use. In CeO<sub>2</sub>-supported Pt catalysts, the CO bands located around 2090 and 2100  $\text{cm}^{-1}$  are generally considered to be the CO adsorbed on single-atom  $\text{Pt}_1$ , while the shoulders around 2070 and 2050  $\text{cm}^{-1}$  are believed to be due to the formation of Pt clusters (*Angew. Chem. Int. Ed.* **2022**, 61, e202112640; *Science*, **2015**, 350, 189; *ACS Catal.* **2019**, 9, 3978–3990; *Angew. Chem.* **2020**, 132, 20872; *J. Am. Chem. Soc.* **2020**, 142, 169; *Nat Commun* **2020**, 11, 4240; *Nat Commun* **2019**, 10, 3808; *Nat Commun* **2019**, 10, 1358; *ChemCatChem* **2020**, 12, 1726, etc.). However, the assignment of CO bands around 2070 and 2050  $\text{cm}^{-1}$  should also be validated by other techniques, such as TEM, XPS, as there is evidence to suggest that similar shoulder may also be present for CO adsorption on low-valence  $\text{Pt}_1$  (*Nat. Mater.* **2019**, 18, 746).

In our previous work (Ref. 22, *Angew. Chem.* **2021**, 60, 26054),  $\text{Pt}_1/\text{CeO}_2$  synthesized by thermal shock method at an extremely high temperature of 1500 K did show CO bands around 2070 and 2050  $\text{cm}^{-1}$ . However, other characterization results such as TEM and XPS (Fig. S12, S15 in Ref. 22) ruled out the existence of Pt clusters. In contrast, the TEM images (**Fig. 4a,4d**), XPS (**Fig. S23**), and Raman spectra (**Fig. S24**) in this work clearly demonstrate the presence of Pt clusters. Thus, it is crucial to combine CO-DRIFTS data with other characterization techniques to make definitive assignments. As suggested by the reviewer, we have included discussions after **Fig. S19**



to explain why the CO bands around 2070 and 2050  $\text{cm}^{-1}$  in this work are attributed to the formation of Pt clusters.

It should be noted that CO adsorption on ceria support is very weak, and the corresponding infrared vibrational bands can only be observed at low temperatures. For example, in the paper mentioned by the reviewer (J. Phys. Chem. C 2022, 126, 9051), the IR spectra were collected at only 113 K (-160 °C). Above room temperature, the observed CO bands can only be assigned to various Pt sites, as seen in the references mentioned in the previous paragraph.

4) The IR band at 2114  $\text{cm}^{-1}$  was assigned to CO bound to oxidized  $\text{PtO}_x$  clusters. However, a closer analysis shows that the 2114  $\text{cm}^{-1}$  signal is proportional in intensity to the one at about 2170  $\text{cm}^{-1}$  (Fig. 3a-c), revealing that they are more likely to originate from the CO gas phase contribution, rather than CO- $\text{PtO}_x$ .

**Reply:** We appreciate the reviewer for bringing this to our attention. Upon a thorough examination of the temperature-dependent DRIFTS spectra presented in **Fig. 3a-c**, we have determined that the infrared band at 2114  $\text{cm}^{-1}$  observed at 120 °C is likely due to the contribution of gas-phase CO, as suggested by the reviewer. Therefore, we have removed the label from **Fig. 3a** and relevant discussion from the manuscript. However, we want to emphasize that this does not affect the primary conclusion of our work, as there is still a distinct IR shoulder for Pt clusters that can be observed and analyzed.

5) The redispersion of Pt NPs into  $\text{Pt}_1$  in  $\text{O}_2$  at 500 °C was visualized by HAADF-STEM. It would be better to mark them in the corresponding images (Fig. S27).

**Reply:** The redispersed  $\text{Pt}_1$  atoms after oxidation treatment at 500 °C are now labeled in high-resolution HAADF-STEM in **Fig. 4b,4e**. Thank you for the suggestion!

6) I would suggest to perform additional calculations on the CO vibrational frequency. The agreement of computed and experimental frequencies of CO adsorbed on different Pt<sub>1</sub> sites would strengthen the conclusions, in particular the proposed structure of adsorbed Pt<sub>1</sub> on ceria.

**Reply:** We have included additional calculations of the CO vibrational frequency on different Pt<sub>1</sub> structures. During the CO oxidation, the Pt-O coordination number in both catalysts decreases. Therefore, we compared the CO vibrational frequency on adsorbed and square-planar PtO<sub>x</sub> (x = 1 ~ 4) with different Pt-O coordination numbers, as shown in **Fig. R2**. We found that CO adsorbed on the square-planar Pt<sub>1</sub>O<sub>3</sub> structure has a CO vibrational frequency of 2090.5 (step site) and 2078.4 cm<sup>-1</sup> (surface), which is similar to the experimental results in **Fig. 3b** (~2088 cm<sup>-1</sup>). In contrast, CO adsorbed on the adsorbed Pt<sub>1</sub>O<sub>3</sub> structure has a CO vibrational frequency of 2100.6 cm<sup>-1</sup>, which agrees with the results in **Fig. 3a** (2101 cm<sup>-1</sup> at 35°C and 2095 cm<sup>-1</sup> at 80°C). By comparing the CO vibrational frequencies obtained from CO-DRIFTS and theoretical calculation, we can conclude that the observed CO-Pt<sub>1</sub> band in CO-DRIFTS should be related to the adsorbed CO on PtO<sub>3</sub>. We have added supplementary calculations in Fig. S33 in the supporting information and relevant discussion in the section of “Theoretical insight into the dynamic behaviors”. With these theoretical calculation results, the adsorbed Pt<sub>1</sub> structure in Pt/CeO<sub>2</sub> can be further confirmed. Thank you for this valuable suggestion.

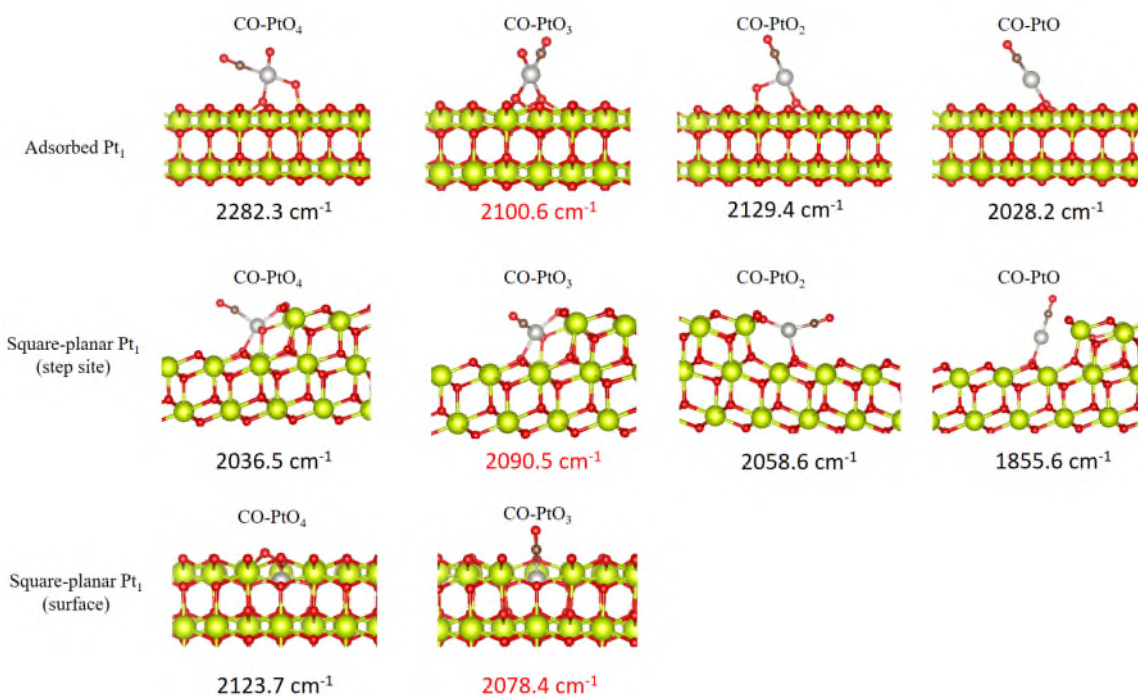

**Figure R2** Vibrational frequency of adsorbed CO on various PtO<sub>x</sub> structures.

7) It has been reported that differently shaped ceria NPs could undergo massive surface restructuring under activation and reaction conditions at elevated temperatures. The morphological changes of ceria support should have significant impact on the interaction with Pt and the activity for CO oxidation (see e.g. J. Phys. Chem. Lett. 2020, 11, 7925).

**Reply:** We agree with the reviewer that surface reconstruction of CeO<sub>2</sub> at different calcination temperatures (500 °C and 800 °C) may cause morphological changes that further affect the interaction between Pt and the supports. To minimize these effects, the CeO<sub>2</sub> support was pre-calcined at 800 °C for 10 h. A small amount of Pt (0.1 wt%) was then impregnated on the synthesized 800CeO<sub>2</sub> support to maintain single-dispersed Pt<sub>1</sub> nature, followed by calcination at 500 and 800 °C to obtain 0.1Pt/800CeO<sub>2</sub> and 0.1Pt<sub>AT</sub>800CeO<sub>2</sub>, respectively. Since the support was pre-calcined at 800 °C, the two samples exhibited similar porosity properties (**Fig. R3a**) and CeO<sub>2</sub>

particle size (Fig. R3b) as the 800CeO<sub>2</sub> support, indicating that the 800CeO<sub>2</sub> support is stable after loading Pt at different calcination temperatures. We assume that there are no significant structural changes of CeO<sub>2</sub> in 0.1Pt/800CeO<sub>2</sub> and 0.1Pt<sub>AT</sub>800CeO<sub>2</sub> compared to the 800CeO<sub>2</sub> support. We found that the activity of 0.1Pt/800CeO<sub>2</sub> was still significantly higher than that of 0.1Pt<sub>AT</sub>800CeO<sub>2</sub> (Fig. S14), similar to Pt/CeO<sub>2</sub> and Pt<sub>AT</sub>CeO<sub>2</sub> (Fig. 2a). Therefore, we believe that the initial Pt<sub>1</sub> local structure is mainly responsible for the CO oxidation activities in this work. The relevant data are presented in Fig. S14-S18, and the discussion has been incorporated after Fig. S14.

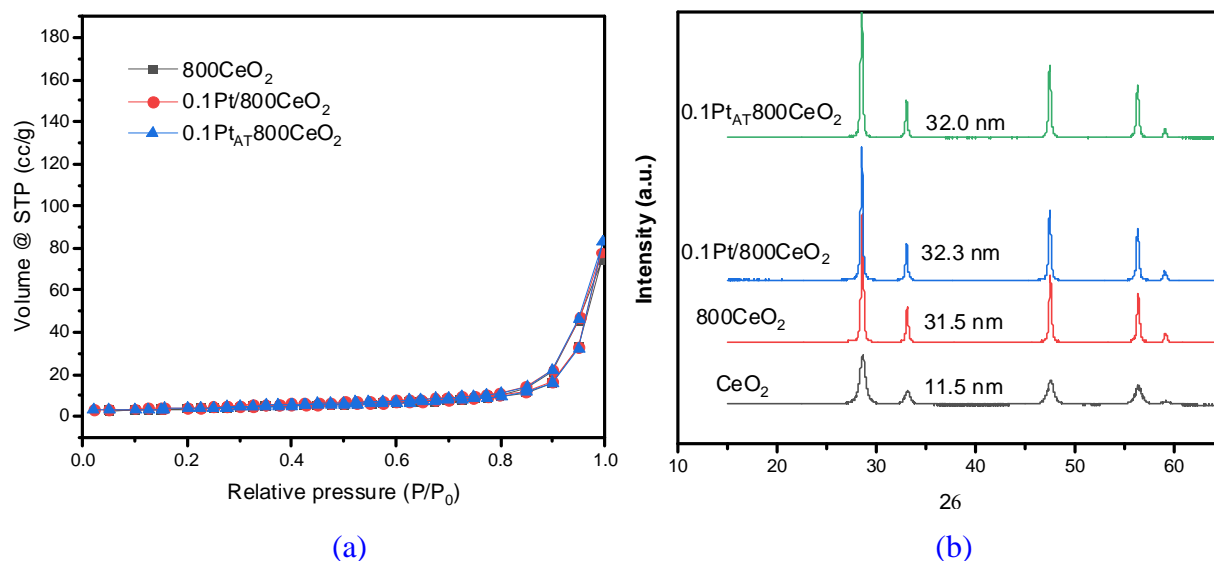

**Figure R3** (a) N<sub>2</sub> adsorption-desorption isotherms at 77 K and (b) XRD patterns of 800CeO<sub>2</sub>, 0.1Pt/800CeO<sub>2</sub> and 0.1Pt<sub>AT</sub>800CeO<sub>2</sub>. The average particle size of CeO<sub>2</sub> in (b) was determined by Scherrer equation from CeO<sub>2</sub> (111) peak.

**Reviewer #2:** This paper reports the dynamic properties of Pt/CeO<sub>2</sub> single atom catalysts according to their initial calcination step (500°C for Pt/CeO<sub>2</sub> and 800°C for Pt<sub>AT</sub>CeO<sub>2</sub>). The Dynamic evolution of the Pt nanostructure was probed under CO oxidation condition and redox sequences by advanced in-situ characterization techniques (EXAFS, DRIFT, RAMAN) and DFT calculations. Noteworthy results deal with the initial Pt nanostructure (Pt single atoms interaction with ceria surface) which was found to depend on the initial annealing temperature. Pt nanoparticles formed by a reduction step redisperse under oxidizing conditions and return to their initial nanostructure.

(1) However, these main findings are not original as dynamic properties of Pt/CeO<sub>2</sub> are well documented in the literature including the initial nanostructure of Pt/CeO<sub>2</sub> single atoms as a function of the annealing temperature. The location of Pt single atoms on ceria after a calcination at low (400-500°C) and high (750-800°C) has been already fully described by similar characterization techniques and DFT (see for instance : 10.1002/anie.201402342, <https://doi.org/10.1038/s41929-020-00508-7>, <https://doi.org/10.1021/acs.jpcc.2c02420>, <https://doi.org/10.1016/j.apcatb.2020.119304>).

**Reply:** Although CeO<sub>2</sub> supported Pt<sub>1</sub> catalysts have been extensively studied using various characterization techniques, some important questions remain unanswered, particularly under reaction conditions. Firstly, the debate on whether Pt<sub>1</sub> on CeO<sub>2</sub> will transform into Pt clusters under CO oxidation conditions is still ongoing. Some researchers argue that Pt<sub>1</sub> is rigid (<https://doi.org/10.1038/ncomms10801>), while others believe that Pt<sub>1</sub> is mobile and can sinter into Pt clusters under CO oxidation conditions (<https://doi.org/10.1038/s41929-020-00508-7>). The question is whether the two types of Pt<sub>1</sub> in Pt/CeO<sub>2</sub> and Pt<sub>AT</sub>CeO<sub>2</sub> change in the same or different ways under reaction conditions. Secondly, no studies have been reported on why the two Pt<sub>1</sub> catalysts, calcined at different temperatures, exhibit drastically different activities.

In this work, we combined *in situ* characterization techniques and DFT calculations to address these questions. Our findings show that Pt/CeO<sub>2</sub>, calcined at 500 °C, has an adsorbed Pt<sub>1</sub> structure

that is mobile and transforms into Pt clusters above 100 °C under CO oxidation conditions. In contrast, Pt<sub>AT</sub>CeO<sub>2</sub> calcined at 800 °C has a square planar Pt<sub>1</sub> structure with a stronger Pt-O interaction and cannot sinter under CO oxidation conditions at the elevated temperatures. Therefore, the real active sites in Pt/CeO<sub>2</sub> and Pt<sub>AT</sub>CeO<sub>2</sub> are the *in-situ* formed Pt clusters and partially reduced Pt<sub>1</sub>, respectively. During the reduction of both Pt/CeO<sub>2</sub> and Pt<sub>AT</sub>CeO<sub>2</sub> in CO, Pt<sub>1</sub> transforms to Pt nanoparticles. However, after undergoing the same re-oxidation treatment at 500 °C, the two reduced samples reverted to different Pt<sub>1</sub> states, similar to their respective initial structures. These main findings are original and have not been reported in previous studies.

(2) The reversibility between single atoms and nanoparticles as a function of temperature and redox atmosphere and its consequence on CO oxidation catalytic activity is also well reported in previous papers (see for instance : 10.1002/anie.200803126, 10.1039/d0cy00732c).

**Reply:** Previous papers have reported on the reversibility between single atoms and nanoparticles in response to changes in temperature and redox atmosphere, as well as their related CO oxidation activity. However, our work focuses specifically on how the initial state of the Pt single atoms, i.e., adsorbed (Pt/CeO<sub>2</sub>) and square-planar Pt<sub>1</sub> (Pt<sub>AT</sub>CeO<sub>2</sub>) synthesized at 500 and 800 °C, respectively, affects the reactivity and reversibility - a topic that has not been previously studied.

To address these questions, we reduced Pt/CeO<sub>2</sub> and Pt<sub>AT</sub>CeO<sub>2</sub> in CO at 275 °C, and found that both reduced samples showed similar CO oxidation activity (**Fig. 2a**) due to the formation of Pt clusters. We then recalcined the two reduced samples in O<sub>2</sub> at 500 °C to study their dispersion behavior. While the redispersion behavior is known, the redispersed Pt<sub>1</sub> structure is unclear. Our finding revealed that the reduced Pt<sub>AT</sub>CeO<sub>2</sub> redispersed into square-planar Pt<sub>1</sub> after recalcination in O<sub>2</sub> at only 500 °C, while the reduced Pt/CeO<sub>2</sub> redispersed to adsorbed Pt<sub>1</sub>. These two different Pt<sub>1</sub> structures exhibited distinct reactivity in CO oxidation, as we explained in the response to comment #1. We believe that the observed memory behavior of Pt<sub>1</sub> is unique.

(3) One of the main difficulties with Pt/CeO<sub>2</sub> catalysts is to differentiate oxidized Pt clusters and Pt single atoms using STEM or EXAFS. The presence of few oxidized Pt clusters can strongly modify the surface reactivity of the catalyst. From my point of view, it is difficult to clearly conclude from the results of the characterization techniques used in this study that the investigated catalysts only contain adsorbed single atoms and no oxidized Pt clusters. Furthermore, the Pt-Pt coordination numbers determined by EXAFS are not reported. In a recent study (10.1021/jacs.9b09156), Resasco et al. have demonstrated that isolated Pt atoms cannot chemisorb CO at low temperature, contrary to the catalysts of this study (Fig 1i). The same paper and another recent study (<https://doi.org/10.1021/acs.jpcc.1c06784>) have assigned bond CO with a stretch at 2095 cm<sup>-1</sup> to adsorption on oxidized Pt clusters. Similar IR bands were observed in this study at 2094 cm<sup>-1</sup> for Pt/CeO<sub>2</sub> and to a lesser extent at 2089 cm<sup>-1</sup> for Pt<sub>AT</sub>CeO<sub>2</sub> at 100°C under CO oxidation condition but were attributed to ionic Pt although they could indicate the presence of small oxidized Pt clusters, especially on the catalyst calcined at 500°C.

**Reply:** We agree that if only a few oxidized Pt clusters are present in Pt/CeO<sub>2</sub>, they may evade detection in STEM or EXAFS. However, we can rule out the influence of oxidized Pt clusters on fresh Pt/CeO<sub>2</sub> for the following reasons:

(1) Resasco et al. (10.1021/jacs.9b09156) claim in their CO-DRIFTS study that “Pt<sub>iso</sub> species with significant coordination to oxygen from the support should bind CO weakly”. This conclusion is based on a computational study (*Phys. Chem. Chem. Phys.* 2016, 18, 22108), which considers some fully coordinated Pt<sub>1</sub> atoms on CeO<sub>2</sub> surface. We fully agree with these computational results. Theoretically, it is not surprising that CO is hardly adsorbed on Pt<sub>1</sub> that is already fully bonded with oxygen. However, fully coordinated Pt<sub>1</sub> (which is stable in air) will transform into less-coordinated Pt<sub>1</sub> under CO oxidation conditions, as evidenced by the decrease in the first-shell Pt-O coordination number (Fig. 3f,3g) after switching the exposing atmosphere from air to CO + O<sub>2</sub>. Our DFT calculation in Fig. 5 also demonstrates similar behavior. Therefore, we cannot simply say that single-atom Pt<sub>1</sub> does not adsorb CO. Furthermore, the temperature-dependent CO-DRIFTS in Fig.

**3a,3b** show that the CO band intensity initially increases with the increase of temperature. If the IR band is ascribed to adsorbed CO on Pt clusters, a higher peak intensity should be obtained at the lower temperature of 35 °C. Instead, the above phenomenon can be explained by the fact that the formation of less-coordinated Pt<sub>1</sub> under CO oxidation condition is favored at high temperatures, which is able to adsorb CO. According to the reviewer's reference (<https://doi.org/10.1021/acs.jpcc.1c06784>), the authors did not attribute the bonded CO stretch at 2095 cm<sup>-1</sup> to adsorption on oxidized Pt clusters. The original statement reads "it is possible that the former was related to Pt<sup>2+</sup> SAC (as proposed by us) or actually oxidized PtO<sub>x</sub> clusters". The authors did not exclude the possibility of Pt<sub>1</sub>, and multiple studies have associated this band around 2090 cm<sup>-1</sup> to CO adsorption on Pt<sub>1</sub> (*Science* **2016**, 353, 150; *Science* **2017**, 358, 1419; *ACS Catal.* **2019**, 9, 3978; *ACS Catal.* **2019**, 9, 8738; *Nat Commun* **2019**, 10, 1358; *Nat. Catal.* **2020**, 3, 824; *Energy Environ. Sci.* **2020**, 13, 4903; *Angew. Chem. Int. Ed.* **2020**, 59, 20691; *Angew. Chem. Int. Ed.* **2021**, 60, 5240; *Angew. Chem. Int. Ed.* **2021**, 60, 4038; *ACS Catal.* **2021**, 11, 8701; *Angew. Chem. Int. Ed.* **2022**, 61, e202112640; *Nature* **2022**, 611, 284; *J. Am. Chem. Soc.* **2022**, 144, 21255; *Nat Commun* **2022**, 13, 7070, etc.). Therefore, it is not justified to attribute the 2090 cm<sup>-1</sup> peak to Pt clusters. Additionally, the weak peak intensity between 2~3 Å in EXAFS (**Fig. 3f,3g**) and the proximity of characteristic peaks of Pt-Ce make it difficult to fit the Pt-Pt coordination numbers precisely under *in situ* EXAFS conditions in CO and O<sub>2</sub>.

(2) To address the reviewer's concerns, we synthesized two catalysts using the same preparation methods with only 0.1 wt% Pt loading: 0.1Pt/CeO<sub>2</sub> and 0.1Pt<sub>AT</sub>CeO<sub>2</sub>. We present the CO oxidation activity and characterizations in **Fig. S14-S18**. The obtained 0.1Pt/CeO<sub>2</sub> is still significantly more active than 0.1Pt<sub>AT</sub>CeO<sub>2</sub>. Further discussion on this can be found after **Fig. S14**. Considering the low Pt loading, it is unlikely for oxidized Pt clusters to exist in fresh 0.1Pt/CeO<sub>2</sub> after calcination at 500 °C in air.

(3) Pt clusters are detected only in Pt/CeO<sub>2</sub> above 100 °C during CO oxidation conditions (**Fig. 3a,3h**). These Pt clusters, which are formed *in situ*, are considered as the active site for CO



oxidation. It is likely that in fresh Pt/CeO<sub>2</sub>, there are only very few Pt clusters present below the detection limit, which should be significantly less than the Pt clusters formed *in situ*. Thus, even if very few Pt clusters exist, that are not expected to affect the activity of Pt/CeO<sub>2</sub>.

(4) In addition, Fig. S13c clearly shows a small band near 2072 cm<sup>-1</sup>, characteristic of Pt clusters as observed after CO reduction (Fig S19). Another insight of the possible presence of PtO<sub>x</sub> clusters in Pt/CeO<sub>2</sub> is its activation energy for CO oxidation which was found to be 44.6 kJ/mole. This value corresponds to reduced catalysts containing Pt nanoparticles (see for instance 10.1021/jacs.9b09156, 10.1039/d0cy00732c). The presence of small PtO<sub>x</sub> clusters in Pt/CeO<sub>2</sub> could also explain its good catalytic activity (Fig. 2a).

**Reply:** You are correct, and we need to distinguish between two states: (1) the initial Pt structure in fresh samples, and (2) the actual Pt structure during the reaction. We have concluded that the initial Pt structure is single-dispersed in both Pt/CeO<sub>2</sub> and Pt<sub>AT</sub>CeO<sub>2</sub>. However, Pt<sub>1</sub> in Pt/CeO<sub>2</sub> can be partially reduced under CO oxidation condition (CO: O<sub>2</sub> = 1: 4, lean condition) below 100 °C, and eventually sintered to Pt clusters after further heating above 100 °C. The *in situ* formation of Pt clusters can be evidenced by *in situ* characterizations such as the shoulder at 2070 cm<sup>-1</sup> in CO-DRIFTS (**Fig. 3a**) and a new cluster signature in XPS (**Fig. 3h**). From the light-off curve of Pt/CeO<sub>2</sub> (**Fig. 2a**), the formation temperature of Pt clusters is similar to the onset temperature of CO oxidation. Therefore, we conclude that the *in situ* formed Pt cluster under reaction conditions is responsible for the enhanced CO oxidation activity in Pt/CeO<sub>2</sub>. In contrast, Pt<sub>1</sub> in Pt<sub>AT</sub>CeO<sub>2</sub> cannot sinter under CO oxidation conditions at elevated temperatures, although Pt<sub>1</sub> can be partially reduced according to *in situ* XANES (**Fig. 3e**), EXAFS (**Fig. 3g**), XPS (**Fig. 3i**), and other analyses. The low apparent activation energy of 44.6 kJ/mol of Pt/CeO<sub>2</sub> is similar to that of Pt clusters mentioned by the reviewer, further demonstrating the *in situ* formation of Pt clusters under CO oxidation conditions. In **Fig. S13c**, the small band around 2072 cm<sup>-1</sup> at 100 °C in Pt/CeO<sub>2</sub> is attributed to CO adsorbed on Pt clusters. The initial CO/O<sub>2</sub> ratio used in this CO-DRIFTS was 1,

unlike the 1:4 ratio used in **Fig. 1i** and **Fig. 2**. We used various CO/O<sub>2</sub> ratios to study the effect of O<sub>2</sub> partial pressures on CO adsorption. Clearly, the CO-rich reaction condition (CO: O<sub>2</sub> = 1) would induce the formation of Pt clusters in Pt/CeO<sub>2</sub> at the lower reaction temperature of 100 °C in **Fig. S13c**. This is reasonable because Pt<sub>1</sub> is stable in O<sub>2</sub> but not in CO, and more CO is expected to favor the formation of Pt clusters. Overall, Pt<sub>1</sub> in Pt/CeO<sub>2</sub> can form Pt clusters under CO oxidation conditions at elevated reaction temperatures.

(5) According to the authors, the Pt single atoms in Pt/CeO<sub>2</sub> would be easier to sinter and to form Pt nanoparticles in reducing atmosphere than ones in Pt<sub>AT</sub>CeO<sub>2</sub>. If so, why the two catalysts achieve the same activity for CO oxidation after the same reduction step in CO? By the same way, Fig. S26 seems to indicate that the redispersion of Pt is slower on Pt<sub>AT</sub>/CeO<sub>2</sub>. Is it coherent with the proposed mechanism?

**Reply:** It should be noted that Pt<sub>1</sub> in Pt/CeO<sub>2</sub> is more prone to sintering under CO oxidation conditions, rather than reducing conditions. In a reducing atmosphere (275 °C for 20 mins), both Pt/CeO<sub>2</sub> and Pt<sub>AT</sub>CeO<sub>2</sub> catalysts showed complete reduction of Pt<sub>1</sub> to Pt nanoparticles, as observed in TEM (**Fig. 4a,4d**), CO-DRIFTS (**Fig. S19**), and XPS (**Fig. S23**), resulting in similar activity (**Fig. 2a**) for both reduced catalysts. This indicates that Pt<sub>1</sub> cannot survive under reducing conditions in these two samples.

Under CO oxidation conditions, Pt<sub>1</sub> in Pt/CeO<sub>2</sub> is more easily reduced, as shown in CO-DRIFTS (**Fig. 3a,3b**) and XANES (**Fig. 3d,3e**). In **Fig. S26**, it can be concluded that Pt nanoparticles in reduced Pt/CeO<sub>2</sub> and Pt<sub>AT</sub>CeO<sub>2</sub> can redisperse even in O<sub>2</sub>-rich CO oxidation conditions (CO: O<sub>2</sub> = 1:4) up to 500 °C. The redispersion rate is slower in reduced Pt<sub>AT</sub>CeO<sub>2</sub>, possibly due to kinetic limitations in the migration of Pt atoms to specific locations to form a square-planar structure. However, both reduced samples can easily redisperse upon direct treatment in O<sub>2</sub> at 500 °C (**Fig. 4c,4f**). Therefore, there is no conflict between this redispersion behavior and our proposed mechanism.

(6) I would recommend before considering this paper for publication to clearly confirm the absence of any  $\text{PtO}_x$  clusters on  $\text{Pt/CeO}_2$  by CO pulse chemisorption and  $\text{H}_2$ -TPR. This latter technique could give an insight on the presence of  $\text{PtO}_x$  clusters from the onset reduction temperature as isolated  $\text{Pt}^{2+}$  sites are inactive towards  $\text{H}_2$  dissociation (10.1021/acscatal.8b00330, 10.1039/c6cp00627b, <https://doi.org/10.1021/acscatal.1c04565>). According to J. Resasco et al. (10.1021/jacs.9b09156), catalysts in which Pt is reduced at low temperatures (around 200 °C) contain  $\text{PtO}_x$  clusters.

**Reply:** We thank the reviewer for the constructive and thought-provoking questions, and we appreciate the opportunity to address them. We acknowledge the reviewer's concern that characterization techniques may not detect all Pt clusters in fresh samples. However, under CO oxidation conditions ( $\text{CO}:\text{O}_2 = 1:4$ ), Pt clusters are formed *in situ* from  $\text{Pt}_1$  in  $\text{Pt/CeO}_2$  above 100 °C (**Fig. 3a,3h**). The *in situ* formed Pt clusters can be detected and considered as the active site in  $\text{Pt/CeO}_2$  for CO oxidation. Even if there are very few Pt clusters present in fresh  $\text{Pt/CeO}_2$  below the detection limit, the content of these clusters should be much less than the Pt clusters formed *in situ*. Furthermore, experiments with low Pt loading (0.1 wt%) had similar experimental results (**Fig. S14-S18**). At such a low Pt loading, we believe that there are no Pt clusters in fresh sample after calcination in air at 500 °C. Even if there are, they do not affect the activity too much because of the *in situ* formed Pt clusters.

Regarding the reviewer's suggestions, we have conducted both CO pulse chemisorption and  $\text{H}_2$ -TPR experiments. For CO pulse chemisorption (**Fig. R1**), about 24.4% and 2.3% of  $\text{Pt}_1$  in  $\text{Pt/CeO}_2$  and  $\text{Pt}_{\text{AT}}\text{CeO}_2$ , respectively, can adsorb CO on average. Since the initial fully-coordinated  $\text{Pt}_1$  cannot adsorb CO until it is reduced to the less-coordinated  $\text{Pt}_1$ , the more CO adsorption on  $\text{Pt/CeO}_2$  at room temperature, the easier it is for  $\text{Pt}_1$  to be reduced. This is in agreement with our DFT calculation in **Fig. S32**, where O vacancy of adsorbed  $\text{PtO}_x$  is much easier to form. However, this technique cannot completely rule out the existence of few Pt clusters. Based on the  $\text{H}_2$ -TPR (**Fig. R2**),  $\text{Pt/CeO}_2$  and  $\text{Pt}_{\text{AT}}\text{CeO}_2$  have similar reduction temperature around 200 °C.

In a recent study by *Nat. Commun.* (<https://doi.org/10.1038/s41467-022-34797-2>), it was also observed that Pt<sub>1</sub>/CeO<sub>2</sub>-550 calcined at 550 °C shows much higher CO oxidation activity than Pt<sub>1</sub>/CeO<sub>2</sub>-800 calcined at 800 °C. This study found that Pt is single-dispersed in both samples. However, the sintering of Pt<sub>1</sub> into Pt clusters under reaction conditions was not considered in Pt<sub>1</sub>/CeO<sub>2</sub>-550, which is one of the core aspects of our work.

Overall, we believe that fresh Pt/CeO<sub>2</sub> after synthesis has no Pt clusters, and the in situ formed Pt clusters are the active sites for CO oxidation in Pt/CeO<sub>2</sub>.

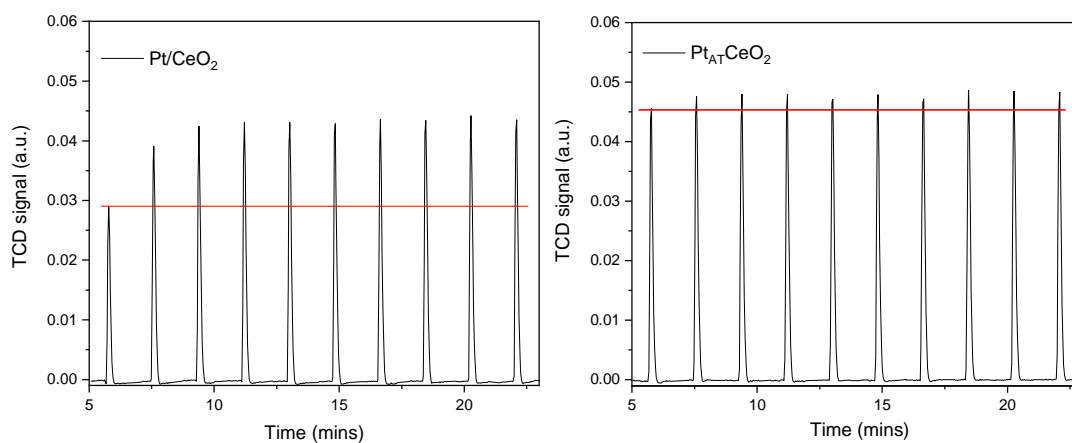

**Figure R1** CO pulse chemisorption for Pt/CeO<sub>2</sub> and Pt<sub>AT</sub>CeO<sub>2</sub> at 25 °C.

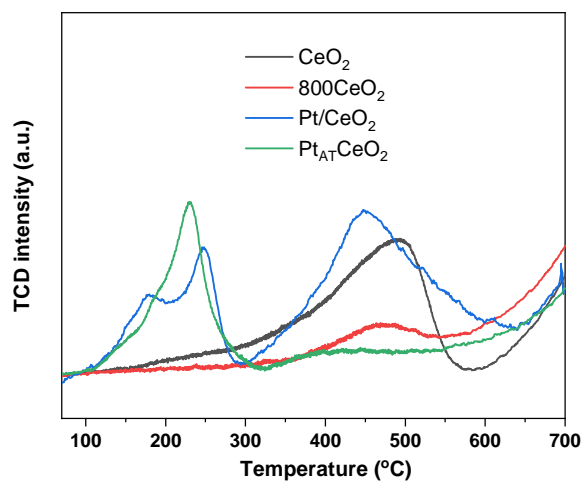

**Figure R2** Temperature-programmed reduction of H<sub>2</sub> of CeO<sub>2</sub>, 800CeO<sub>2</sub>, Pt/CeO<sub>2</sub> and Pt<sub>AT</sub>CeO<sub>2</sub>.

**Reviewer #3:** This manuscript investigates the reversible structural evolution of Pt/CeO<sub>2</sub> and Pt<sub>AT</sub>CeO<sub>2</sub> SACs under different atmospheres. In addition, the two SACs catalysts display dramatically different catalytic activity towards CO oxidation, which are explained by the different initial Pt<sub>1</sub> local configurations. However, considering some catalytic behavior of the SACs, the identification of the active site and the related structural-activity relationship is suspicious, which is needed to be addressed in details.

**Reply:** We appreciate the thoughtful and constructive comments from the reviewer, which have helped to improve the quality of the manuscript. In order to provide a more comprehensive discussion on the identification of the active site and the structural-activity relationship, we have addressed the reviewer's comments in the following responses

(1) P13, Line 310: The processing temperatures for Pt/CeO<sub>2</sub>-CO and Pt/CeO<sub>2</sub>-CO-O<sub>2</sub> are not shown in the Methods section.

**Reply:** The reduction and oxidation temperatures are 275 and 500 °C respectively, which has been added in the Methods section. Thanks for pointing this out.

(2) For Pt<sub>AT</sub>CeO<sub>2</sub> sample treated at 800 °C, the particle size of CeO<sub>2</sub> increases from 12 to ~22 nm with the significantly decreased surface area. In addition to the surface reconstruction, the agglomeration of bulk phase CeO<sub>2</sub> is inevitable. If it is possible that a large amount of Pt enters the lattice of CeO<sub>2</sub>? This will affect the amount of available Pt atoms on the surface.

**Reply:** This is a good question. Based on the XRD patterns in **Fig. S2**, there is no noticeable shift of diffraction peaks of CeO<sub>2</sub> in Pt<sub>AT</sub>CeO<sub>2</sub> compared to pure CeO<sub>2</sub> and Pt/CeO<sub>2</sub>. In addition, the surface Pt contents of Pt/CeO<sub>2</sub> and Pt<sub>AT</sub>CeO<sub>2</sub>, as determined by XPS, are 0.8% and 0.9% (**Table S1**). If a large amount of Pt entered the CeO<sub>2</sub> lattice in Pt<sub>AT</sub>CeO<sub>2</sub>, an obvious shift of XRD diffraction peaks and a decrease in surface Pt content would have been expected. Furthermore, if Pt/CeO<sub>2</sub> and Pt<sub>AT</sub>CeO<sub>2</sub> were treated in CO at 275 °C, the two reduced catalysts exhibited similar

reactivity (**Fig. 2a**). If a large amount of Pt were inside the lattice of  $\text{CeO}_2$ , the surface Pt clusters obtained after reduction of  $\text{Pt}_{\text{AT}}\text{CeO}_2$  should be less than those in reduced  $\text{Pt}/\text{CeO}_2$ , which would cause lower activity. Therefore, the low reactivity of  $\text{Pt}_{\text{AT}}\text{CeO}_2$  is not considered due to less exposed Pt atoms on the surface.

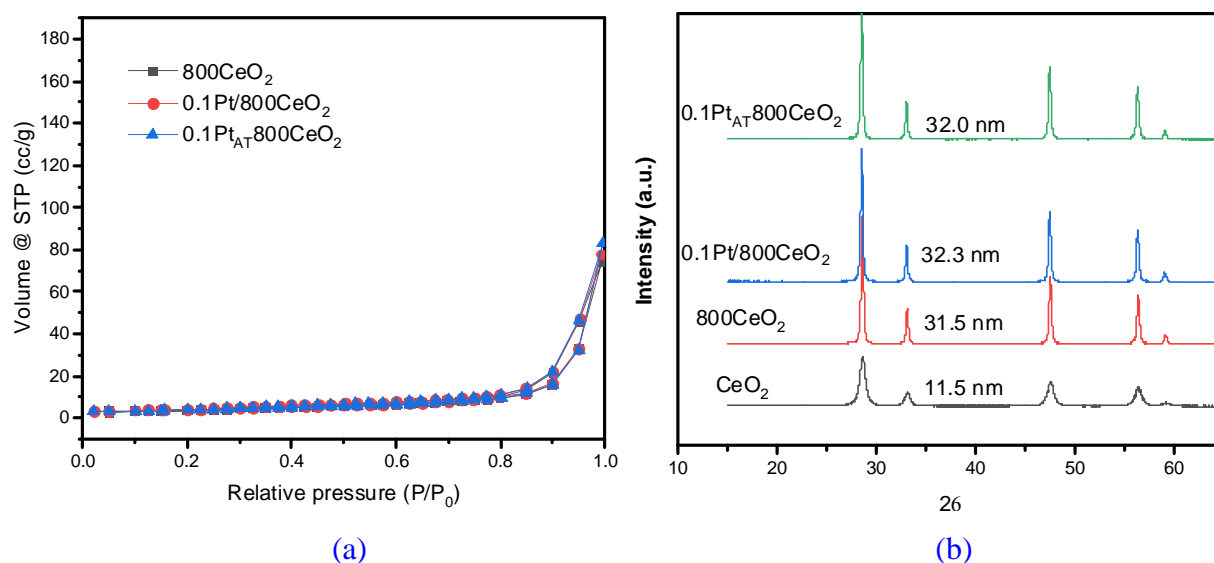

**Figure R1** (a)  $\text{N}_2$  adsorption-desorption isotherms at 77 K and (b) XRD patterns of  $800\text{CeO}_2$ ,  $0.1\text{Pt}/800\text{CeO}_2$  and  $0.1\text{Pt}_{\text{AT}}800\text{CeO}_2$ . The average particle size of  $\text{CeO}_2$  in (b) was determined by Scherrer equation from  $\text{CeO}_2$  (111) peak.

To further prove this,  $\text{CeO}_2$  support was pre-calcined at 800 °C for 10 h. A small amount of Pt (0.1 wt%) was then impregnated on the above-synthesized  $800\text{CeO}_2$  support to maintain single-dispersed properties, followed by calcination at 500 and 800 °C to obtain  $0.1\text{Pt}/800\text{CeO}_2$  and  $0.1\text{Pt}_{\text{AT}}800\text{CeO}_2$ , respectively. Because of the pre-calcination of the support at 800 °C,  $0.1\text{Pt}/800\text{CeO}_2$  and  $0.1\text{Pt}_{\text{AT}}800\text{CeO}_2$  exhibited similar porosity properties (**Fig. R1a**) and  $\text{CeO}_2$  particle size (**Fig. R1b**) as the  $800\text{CeO}_2$  support. These indicate that there was no sintering of  $800\text{CeO}_2$  particles after calcining Pt-impregnated samples at both 500 and 800 °C. It was found

that the activity of 0.1Pt/800CeO<sub>2</sub> was still significantly higher than that of 0.1Pt<sub>AT</sub>800CeO<sub>2</sub> (**Fig. S14**), similar to Pt/CeO<sub>2</sub> and Pt<sub>AT</sub>CeO<sub>2</sub> (**Fig. 2a**). Therefore, we can rule out the effect of surface Pt density on the reactivity, since Pt atoms should all stay on the surface in this case. The relevant data are presented in **Fig. S14-S18**, and the discussion has been incorporated after **Fig. S14**.

(3) In Fig. 1i, considering the spectral resolution (4 cm<sup>-1</sup>), the different IR band is too small (5 cm<sup>-1</sup>). In addition, why the CO-DRIFT spectra were collected at 100 °C under reaction conditions? The CO atmosphere and room temperature should be better for the characterization.

**Reply:** The difference in the IR frequencies of CO adsorbed on the two Pt<sub>1</sub> measured at 100 °C is indeed insignificant in **Fig. 1i**. However, it does exist. The shift in the CO vibrational peak becomes more pronounced at 35 °C, i.e. 2095 vs. 2088 cm<sup>-1</sup> (**Fig. 3a,3b**). A similar phenomenon was also observed in a recent work in *Nat. Commun.* (<https://doi.org/10.1038/s41467-022-34797-2>), where the IR vibrational frequency of Pt<sub>1</sub>/CeO<sub>2</sub> calcined at 550 °C was lower than that of Pt<sub>AT</sub>CeO<sub>2</sub> calcined at 800 °C in the CO-DRIFTS results.

DRIFTS were collected under CO oxidation rather than pure CO for the following reasons. The reaction atmosphere is a mixed gas of CO and O<sub>2</sub>, and it is preferable to study the Pt structure changes under reaction conditions. Additionally, it is well known that the Pt structure changes when the CO+O<sub>2</sub> atmosphere is switched to pure CO. For CO adsorbed on stable structures, CO adsorption at lower temperature is favored. However, the initial Pt<sub>1</sub> structure in Pt/CeO<sub>2</sub> and Pt<sub>AT</sub>CeO<sub>2</sub> cannot chemisorb CO due to saturated Pt-O coordination, as explained in response to question 3 from reviewer 2. Partial removal of the surrounding oxygens of Pt<sub>1</sub> (**Fig. 3d,3e**) at elevated temperatures promotes CO adsorption. As a result, CO-DRIFTS were collected at different temperatures (35, 80, 100, 120, 150, 180 °C) in this work, as shown in the **Fig. 3a,3b,1i**. However, the peak intensity of adsorbed CO is weaker at 35 °C for both samples. To compare with a relatively stronger peak intensity, CO-DRIFTS at 100 °C were conducted as shown in **Fig. 1i**.

(4) According to the evaluation results, the Pt NPs show significantly better catalytic activity than SACs. Therefore, confirming the real active site in the two fresh SACs is very important for the following structure-activity relationship. As shown in Fig. 2a and Fig. S14, Pt/CeO<sub>2</sub> and 0.1Pt/CeO<sub>2</sub> show significant different light-off temperatures (100 vs. 200 °C). At 200 °C, the CO conversion is 100% over Pt/CeO<sub>2</sub>. If the active sites are the same for these two SACs catalysts, the CO conversion should be larger than 10% for 0.1Pt/CeO<sub>2</sub>, which is accurately ~2%. This indicates that the active site in Pt/CeO<sub>2</sub> is more active. How does the author comment on this result?

**Reply:** Thank you for the nice question! The Pt<sub>1</sub> structure in both Pt/CeO<sub>2</sub> and Pt<sub>AT</sub>CeO<sub>2</sub> changes with temperature under CO oxidation condition, as shown in the *in situ* CO-DRIFTS (**Fig. 3a,3b**), XANES (**Fig. 3d,3e**), EXAFS (**Fig. 3f,3g**), XPS (**Fig. 3h,3i**) etc. Briefly, Pt<sub>1</sub> in Pt/CeO<sub>2</sub> is partially reduced under CO oxidation condition below 100 °C but still maintains the single-dispersed property (**Fig. 3a,3d,3f**). However, Pt<sub>1</sub> transforms to Pt clusters once the temperature is higher than 100 °C (**Fig. 3a, 3f**). From the light-off curve of Pt/CeO<sub>2</sub> (**Fig. 2a**), the formation temperature of Pt clusters is similar to the onset temperature of Pt/CeO<sub>2</sub>. Therefore, we conclude that the *in situ* formed Pt clusters under reaction condition are responsible for the activity in Pt/CeO<sub>2</sub>.

In contrast, Pt<sub>1</sub> in Pt<sub>AT</sub>CeO<sub>2</sub> cannot transform to Pt clusters under CO oxidation conditions at the elevated temperatures, although Pt<sub>1</sub> will be partially reduced according to *in situ* XANES (**Fig. 3e**), EXAFS (**Fig. 3g**), XPS (**Fig. 3i**) etc. That is why Pt/CeO<sub>2</sub> is much more active than Pt<sub>AT</sub>CeO<sub>2</sub>.

Regarding the reviewer's comment, Pt/CeO<sub>2</sub> and 0.1Pt/CeO<sub>2</sub> have the same initial Pt<sub>1</sub> structure, which is the adsorbed Pt<sub>1</sub>. However, the initial Pt<sub>1</sub> structure is not the real active site under reaction condition. Pt<sub>1</sub> will sinter into Pt clusters above 100 °C, and the *in situ* formed Pt clusters are the real active sites. Since surface Pt density of 0.1Pt/CeO<sub>2</sub> is lower than that of Pt/CeO<sub>2</sub>, mobile Pt<sub>1</sub> is expected to be less likely to sinter in 0.1Pt/CeO<sub>2</sub>. Therefore, we found a lower activity per Pt atom in 0.1Pt/CeO<sub>2</sub>.



In response to this nice comment, we included a sentence after **Fig. S14**: “It should be noted that CO conversion is almost 100% over Pt/CeO<sub>2</sub> at 200 °C (**Fig. 2a**), but only around 2% over 0.1Pt/CeO<sub>2</sub>. If the initial Pt<sub>1</sub> structure in Pt/CeO<sub>2</sub> was the real active site, we should expect around 10% conversion over 0.1Pt/CeO<sub>2</sub> at 200 °C. The much lower reactivity in 0.1Pt/CeO<sub>2</sub> might further prove that the *in situ* formed Pt clusters are the real active sites in Pt/CeO<sub>2</sub>, since the lower surface Pt<sub>1</sub> density in 0.1Pt/CeO<sub>2</sub> is less likely to sinter under the same condition.”

(5) Similar results are shown over Pt<sub>AT</sub>CeO<sub>2</sub> and 0.1Pt<sub>AT</sub>CeO<sub>2</sub> (Figure 2a and S14), the light-off temperatures are 200 and 300 °C, respectively. In addition, the catalytic activity of 0.1Pt<sub>AT</sub>CeO<sub>2</sub> is similar with that over CeO<sub>2</sub> (Figure S10). Therefore, the Pt cluster and CeO<sub>2</sub> are important active sites for the fresh Pt/CeO<sub>2</sub> and Pt<sub>AT</sub>CeO<sub>2</sub> catalysts, which are not well considered in this manuscript.

**Reply:** We have combined the light-off curves for 800CeO<sub>2</sub>, Pt<sub>AT</sub>CeO<sub>2</sub> and 0.1Pt<sub>AT</sub>CeO<sub>2</sub> in the **Fig. R2a** below. We agree that CeO<sub>2</sub> support contributes to the partial reactivity for Pt<sub>AT</sub>CeO<sub>2</sub> and 0.1Pt<sub>AT</sub>CeO<sub>2</sub> (**Fig. R2a**). However, the catalytic activities of Pt<sub>AT</sub>CeO<sub>2</sub> and 0.1Pt<sub>AT</sub>CeO<sub>2</sub> are still higher than that of pure CeO<sub>2</sub> (**Fig. R2a**). Even with only 0.1 wt% Pt on the CeO<sub>2</sub> surface, the difference in activity is evident, suggesting that the square-planar Pt<sub>1</sub> in Pt<sub>AT</sub>CeO<sub>2</sub> is indeed more active than CeO<sub>2</sub>. Nevertheless, CeO<sub>2</sub> does contribute to partial activity above 300 °C.

To exclude the influence of CeO<sub>2</sub>, we obtained the light-off curves of Pt<sub>AT</sub>CeO<sub>2</sub> and 0.1Pt<sub>AT</sub>CeO<sub>2</sub> by subtracting the activity of CeO<sub>2</sub>, as shown in **Fig. R2b**. The CO conversion over Pt<sub>AT</sub>CeO<sub>2</sub> is roughly 10 times higher than that of 0.1Pt<sub>AT</sub>CeO<sub>2</sub>, for example, 48.4% and 4.6% at 347 °C, respectively (**Fig. R2b**). In Pt<sub>AT</sub>CeO<sub>2</sub>, the influence of CeO<sub>2</sub> is not significant, especially below 300 °C (**Fig. R2b**), which does not affect the activity comparison of Pt/CeO<sub>2</sub> and Pt<sub>AT</sub>CeO<sub>2</sub>.

*In situ* characterization results indicate that square-planar Pt<sub>1</sub> in Pt<sub>AT</sub>CeO<sub>2</sub> cannot transform into Pt clusters under reaction condition. In contrast, the adsorbed Pt<sub>1</sub> in Pt/CeO<sub>2</sub> partially transforms

into Pt clusters above 100 °C under CO oxidation conditions (Fig. 3a,3d,3h), contributing to near 100% CO conversion at ~200 °C (Fig. 2a). Therefore, the CeO<sub>2</sub> support has a negligible effect on the activity of Pt/CeO<sub>2</sub>. The order of activity is as follows: Pt clusters (*in situ* formed from adsorbed Pt<sub>1</sub> in Pt/CeO<sub>2</sub>) > square-planar Pt<sub>1</sub> in Pt<sub>AT</sub>CeO<sub>2</sub> > CeO<sub>2</sub>.

We have added the following figures as the new Fig. S15 and included discussions about the effect of CeO<sub>2</sub> support after Fig. S15.

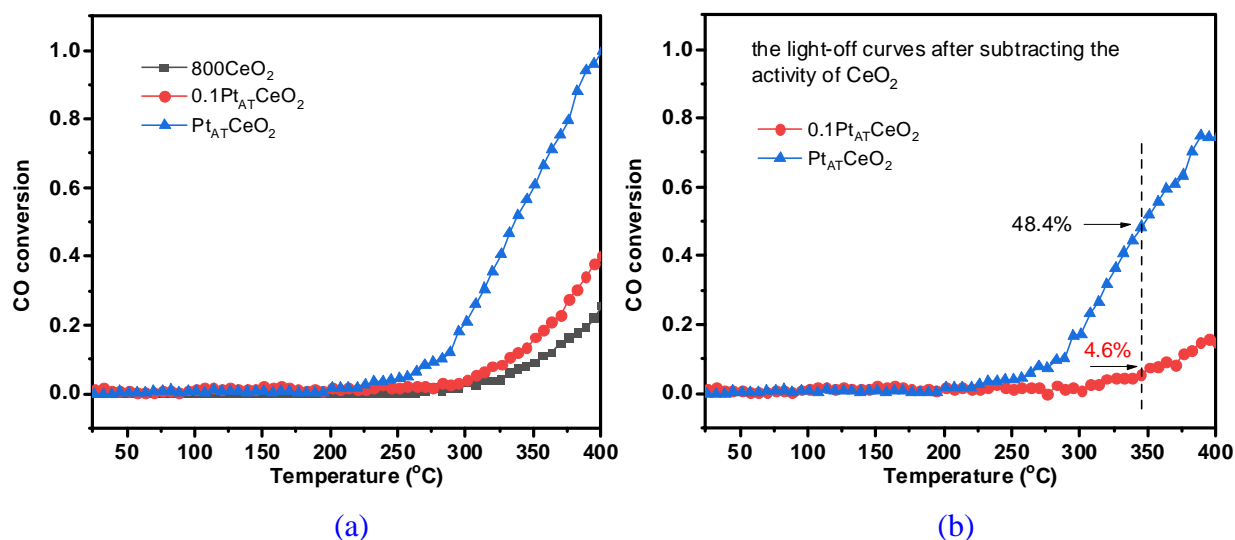

**Figure R2** (a) CO oxidation performance of 800CeO<sub>2</sub> (precalcined at 800 °C), 0.1Pt<sub>AT</sub>CeO<sub>2</sub>, and Pt<sub>AT</sub>CeO<sub>2</sub>; (b) CO oxidation performance of 0.1Pt<sub>AT</sub>CeO<sub>2</sub>, and Pt<sub>AT</sub>CeO<sub>2</sub> after subtracting the activity of CeO<sub>2</sub>.

## REVIEWERS' COMMENTS

Reviewer #1 (Remarks to the Author):

The authors have adequately responded to most of my concerns. I have only few minor comments below.

1) and 2), The answers are sufficient.

3) The strong interaction between Pt and ceria support could also leads to a substantial modification in structural and electronic properties of ceria surfaces, which has been demonstrated by the IR band splitting of the CO species weakly bound to different surface Ce sites using a low-temperature IR approach. This surface-sensitive and non-destructive approach enables to characterize the intrinsic properties by identifying all surface and interfacial sites exposed by both Pt and ceria support. A short discussion is required regarding the Pt-CeO<sub>2</sub> interaction and the Pt-induced Ce-CO band splitting as reported in the literature.

4) to 6), The answers are sufficient.

7) As regards the thermally driven restructuring of ceria surfaces, I would suggest to include a short paragraph in the main text to mention the impact of ceria surface morphologies.

Reviewer #3 (Remarks to the Author):

The authors have improved the article and I support its publication in the current form.  
Please increase the resolution of Figure 1d.

**Reviewer #1:** The authors have adequately responded to most of my concerns. I have only few minor comments below.

1) and 2), The answers are sufficient.

**Reply:** Thanks!

3) The strong interaction between Pt and ceria support could also leads to a substantial modification in structural and electronic properties of ceria surfaces, which has been demonstrated by the IR band splitting of the CO species weakly bound to different surface Ce sites using a low-temperature IR approach. This surface-sensitive and non-destructive approach enables to characterize the intrinsic properties by identifying all surface and interfacial sites exposed by both Pt and ceria support. A short discussion is required regarding the Pt-CeO<sub>2</sub> interaction and the Pt-induced Ce-CO band splitting as reported in the literature.

**Reply:** To address the reviewer's comment, we have included one sentence in the discussion of DRIFTS part and cited the mentioned literature as: *Presence of Pt<sub>1</sub> on CeO<sub>2</sub> surface could induce the splitting of CO-Ce peak, which only exists below room temperature.*<sup>31</sup>

4) to 6), The answers are sufficient.

**Reply:** Thanks!

7) As regards the thermally driven restructuring of ceria surfaces, I would suggest to include a short paragraph in the main text to mention the impact of ceria surface morphologies.

**Reply:** To address the reviewer's comment, we have added a couple of sentences regarding the restructuring of CeO<sub>2</sub> surface in the main text and cited the relevant reference as: *It has been reported that surface reconstruction of CeO<sub>2</sub> at different calcination temperatures would affect the catalytic activity.*<sup>25</sup> *To minimize these effects, the CeO<sub>2</sub> support was pre-calcined at 800 °C for 10 h to yield 800CeO<sub>2</sub>, followed by deposition of 0.1 wt% Pt (to maintain the atomically dispersed*

*nature*) at 500 and 800 °C to yield 0.1Pt/800CeO<sub>2</sub> and 0.1Pt<sub>AT</sub>800CeO<sub>2</sub>, respectively. Since the support was pre-calcined at 800 °C, these two samples exhibited similar porosity properties (**Fig. S17, Table S3**) and CeO<sub>2</sub> particle size (**Fig. S18**) as the 800CeO<sub>2</sub> support. We found that the activity of 0.1Pt/800CeO<sub>2</sub> was still significantly higher than that of 0.1Pt<sub>AT</sub>800CeO<sub>2</sub> (**Fig. S14**), similar to Pt/CeO<sub>2</sub> and Pt<sub>AT</sub>CeO<sub>2</sub> (**Fig. 3a**).

**Reviewer #3:** The authors have improved the article and I support its publication in the current form. Please increase the resolution of Figure 1d.

**Reply:** The resolution of Figure 1d has been improved. Thanks!
